# Supplementary material
Source: PubMed Central journal article supplement (PMC2898581)
Supplement: JCI37873sd.pdf [file JCI37873sd.pdf]

## A. Background

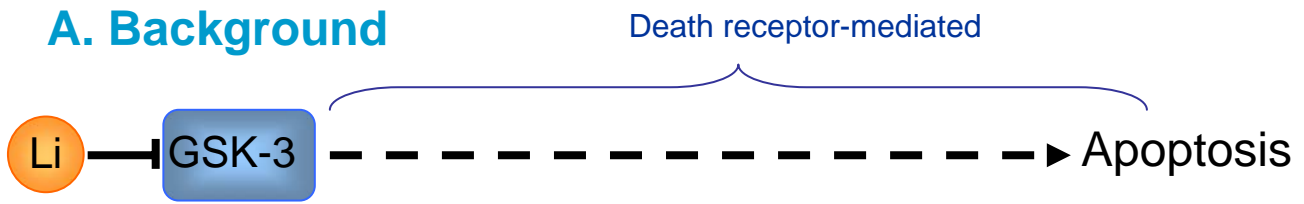

## B. Hypothesis

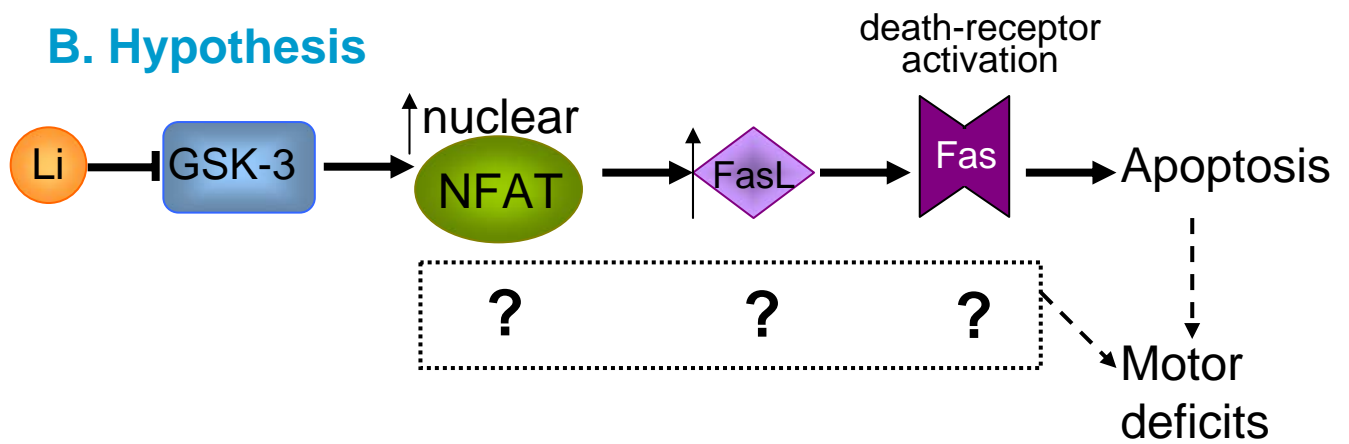

## C. Confirmatory results

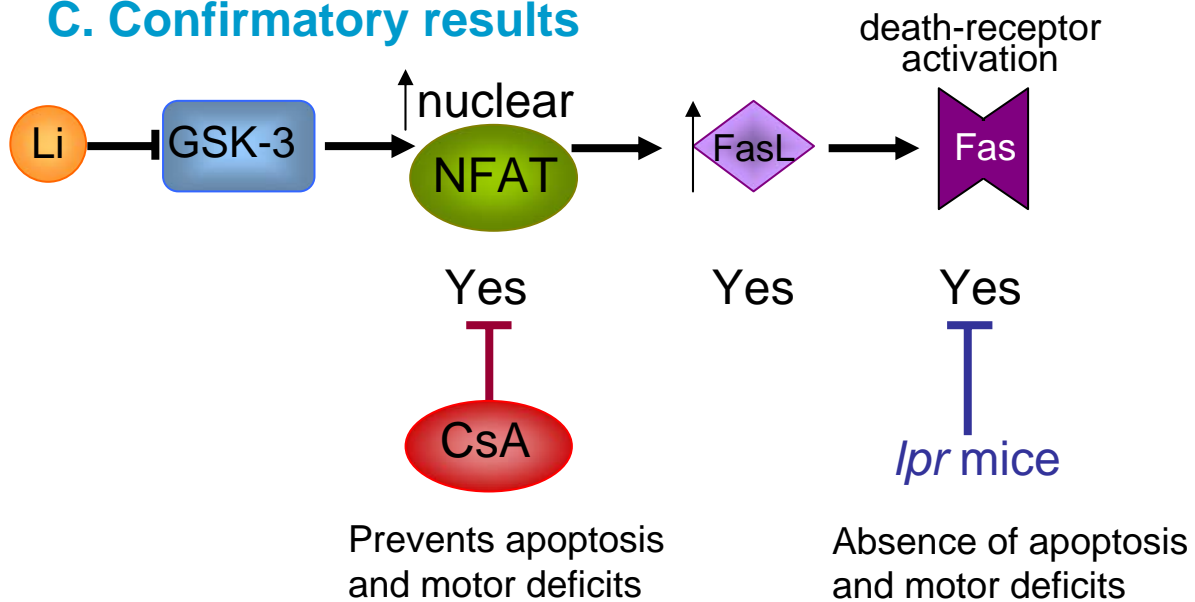

Supplementary figure 1

Scheme summarizing the background, the working hypothesis and the confirmatory results obtained.

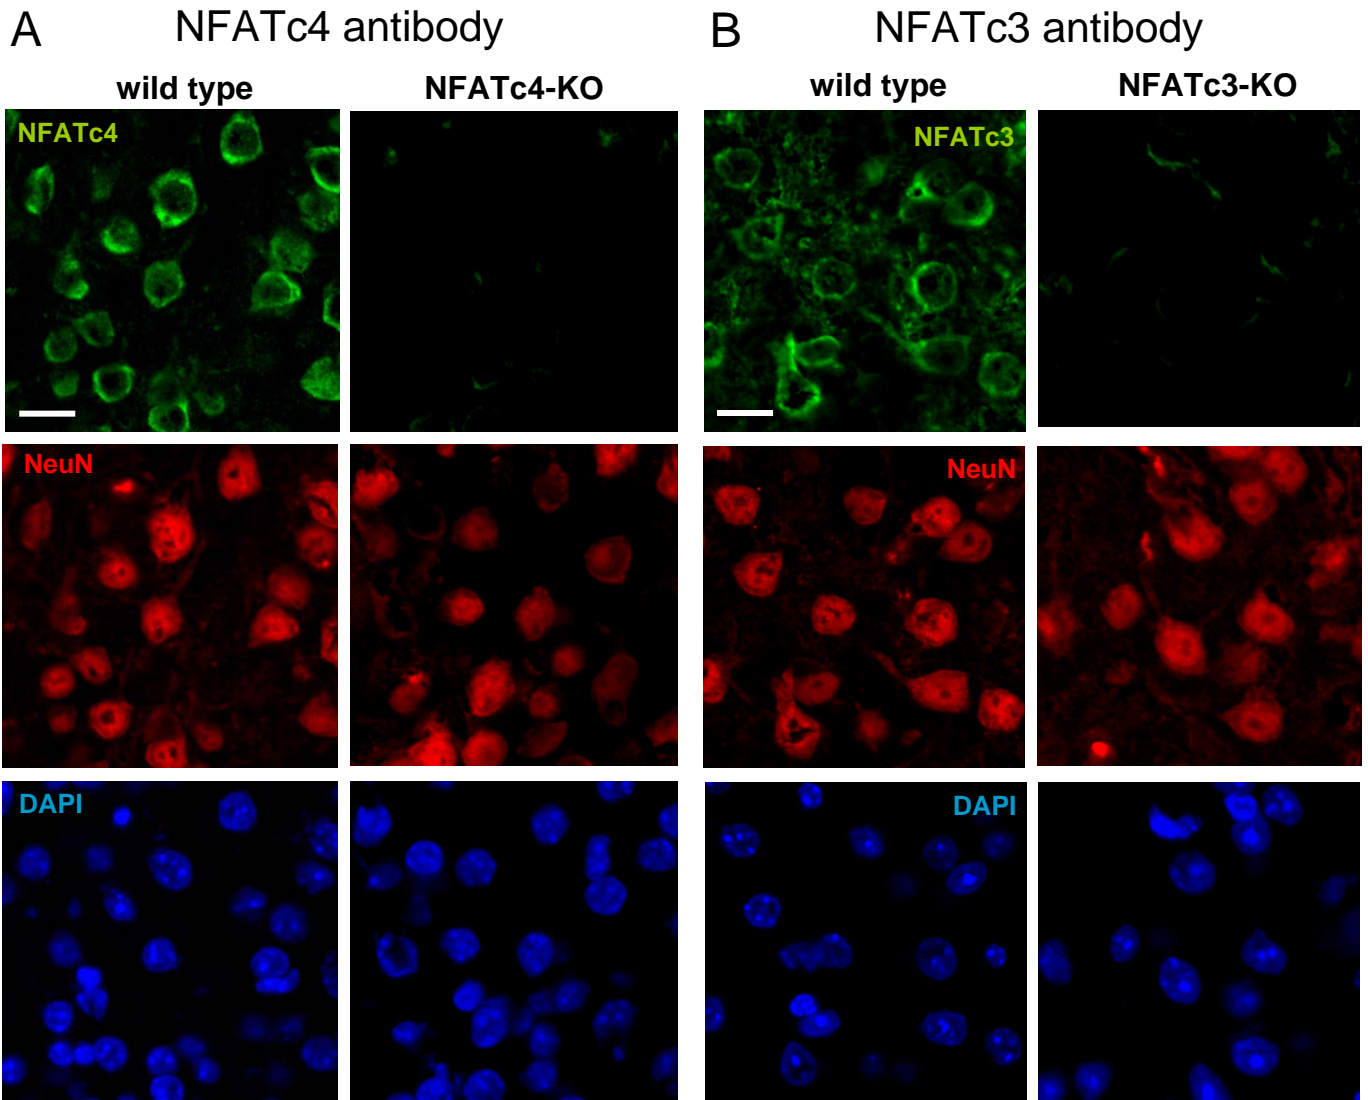

### Supplementary figure 2

The specificity of the employed NFATc4 and NFATc3 antibodies was confirmed by staining brain sections from NFATc4- and NFATc3-knock-out mice. **(A)** Representative confocal microscope images of double immunofluorescence with the H-74 anti-NFATc4 polyclonal antibody and an anti-NeuN monoclonal antibody as well as DAPI nuclear counterstaining in cortex of wild-type (left panels) or NFATc4 knock-out mice (right panels). **(B)** Representative confocal microscope images of double immunofluorescence with the M-75 anti-NFATc3 polyclonal antibody and an anti-NeuN monoclonal antibody as well as DAPI nuclear counterstaining in cortex of wild-type (left panels) or NFATc3 knock-out mice (right panels). Scale bars correspond to 20  $\mu$ m.
